# Supplementary material for: A comparative genome analysis of the Bacillota (Firmicutes) class Dehalobacteriia
Source: PubMed Central journal article supplement (PMC10327494; doi:10.1099/mgen.0.001039), 2023-06-09

Table S1. List of *Dehalobacteriia* genomes used in the analysis (in green rows)

Types of the genomes provided in this table are *isolate*, *mixed culture* and MAG  
 Cmpl. : CheckM completion rate  
 Cntmn: ChecM contamination rate

| Order                | Genome                   | Genome Assembly ID | Size (Mb)       | Cmpl. (%) | Cntmn (%) | GC (%) | CD (%) | Protein Count | 16S   | Ref. |
|----------------------|--------------------------|--------------------|-----------------|-----------|-----------|--------|--------|---------------|-------|------|
| o__Dehalobacteriales | <i>D.farmicoaceticum</i> | GCF_002224645.1    | 3.8             | 95.6      | 2.6       | 43.2   | 86.1   | 3,620         | Yes   | 9    |
|                      | <i>Ca. F. warabiya</i>   | GCF_002777255.1    | 6.4             | 98.9      | 2.7       | 46.4   | 87.5   | 5,804         | Yes   | 11   |
|                      | DUPU01                   | GCA_012838175.1    | 2.4             | 91.9      | 2.0       | 42.1   | 88.8   | 2,447         | No    | 38   |
|                      | HGM13862                 | GCF_900760825.1    | 1.7             | 79.9      | 2.7       | 47.6   | 87.1   | 1,878         | No    | N/A  |
|                      | AS06rmzACSIP_243         | GCA_012515255.1    | 1.3             | 71.2      | 2.0       | 55.4   | 88.6   | 1,371         | No    | 38   |
|                      | UBA5752                  | GCA_002419055.1    | 2.1             | 91.9      | 0.7       | 42.7   | 88.8   | 1,965         | No    | 36   |
| o__UBA4068           | UBA4068                  | GCA_002382665.1    | 2.0             | 91.2      | 0.3       | 43.2   | 89.0   | 1,966         | No    | 36   |
|                      | UBA5757                  | GCA_002418965.1    | 1.9             | 89.1      | 0.9       | 43.8   | 86.2   | 1,808         | Yes   | 36   |
|                      | Lab288P3bin203           | GCA_009783495.1    | 1.1             | 59.6      | 1.8       | 55.7   | 87.6   | 1,315         | No    | 38   |
|                      | Nt197P3bin103            | GCA_009783415.1    | 2.8             | 64.2      | 2.5       | 46.6   | 86.8   | 2,197         | No    | 38   |
|                      | Nt197P4bin8              | GCA_009778255.1    | 2.2             | 70.8      | 1.7       | 42.9   | 90.0   | 2,024         | No    | 38   |
|                      | Nt197P3bin19             | GCA_009782975.1    | 0.9             | 57.8      | 0.9       | 52.2   | 90.0   | 968           | No    | 38   |
|                      | UBA4997                  | GCA_002398485.1    | 1.7             | 78.5      | 0.8       | 40.5   | 74.9   | 1,568         | Yes   | 39   |
|                      | UBA5755                  | GCA_002419005.1    | 1.5             | 90.9      | 0.5       | 42.2   | 89.7   | 1,456         | No    | 36   |
|                      | UBA7702                  | GCA_002482535.1    | 2.6             | 93.1      | 0.9       | 49.5   | 88.8   | 2,402         | No    | 40   |
|                      | o__UBA7702               | RUG14212           | GCA_902796855.1 | 2.1       | 84.8      | 2.6    | 57.4   | 88.8          | 1,936 | No   |
| RUG11176             |                          | GCA_902766525.1    | 1.5             | 80.5      | 0.9       | 49.9   | 90.4   | 1,649         | No    | 37   |

**Table S2. List of primer sequences matched against 16S sequences from *Dehalobacteriia***

a. Primer sequences from Engelbrekston et al., ISMEJ 2010, representative of commonly used 16S rRNA gene primers

b. Metacharacters: K=GT, M=AC, R=AG, S=CG, W=AG, Y=CT

c. matches, mismatches

| 16S rRNA primer (a) | 5'-3' sequence (b)   | Dehalobacteriia sequence (c) | Variants                         | Comments                                           |
|---------------------|----------------------|------------------------------|----------------------------------|----------------------------------------------------|
| 27F                 | AGAGTTTGATCMTGGCTCAG | AGAGTTTGATCCTGGCTCAG         | f__UBA5755: AGAGTTTGATCCTGGATCAG | Should amplify, with exception of variant          |
| 357F                | CTCTACGGGAGGCAGCAG   | CTCTACGGGAGGCAGCAG           | none                             | Should amplify                                     |
| 530F                | GTGCCAGCMGCCGCGG     | GTGCCAGCAGCCGCGG             | none                             | Should amplify                                     |
| 803F                | ATTAGATACCTGGTAGTC   | ATTAGATACCCGGTAATC           | none                             | Probably won't amplify with mismatches near 3' end |
| 926F                | AAACTYAAAKGAATTGACGG | AAACTCAAAGGAATTGACGG         | none                             | Should amplify                                     |
| 1114F               | GCAACGAGCGCAACCC     | GCAACGAGCGCAACCC             | none                             | Should amplify                                     |
| 342R                | CTGCTGCSYCCGTAG      | CTGCTGCCTCCGTAG              | none                             | Should amplify                                     |
| 519R                | GWATTACCGCGGCKGCTG   | GTATTACCGCGGCTGCTG           | none                             | Should amplify even with mismatch at 5' end        |
| 787R                | CTACCGGGTATCTAAT     | TTACCGGGTATCTAAT             | none                             | May amplify, noting mismatches closer to 5' end    |
| 907R                | CCGTCAATTCMTTRAGTTT  | CCGTCAATTCCTTTGAGTTT         | none                             | Should amplify                                     |
| 1100R               | GGGTTGCGCTCGTTG      | GGGTTGCGCTCGTTG              | none                             | Should amplify                                     |
| 1392R               | ACGGGCGGTGTGTRC      | ACGGGCGGTGTGTAC              | none                             | Should amplify                                     |

**Table S3. List of 16S rRNA gene amplicon datasets associated with the identified *Dehalobacteriia* sequences**

5% raw num: raw number of sequences that share 95% or higher similarity to *Dehalobacteriia* sequences

5% perc: proportion of the "5% raw num" sequences out of total downloaded sequences from each study

| Isolation Source                                                                                | Reference | Total Downloaded Sequences | 5% raw num   | 5% perc |
|-------------------------------------------------------------------------------------------------|-----------|----------------------------|--------------|---------|
| Mouse cecum                                                                                     | 41        | 7223                       | 7            | 0.10    |
| Cecal contents from <i>Mus musculus</i> strain C57BL/6J; sample lean_donor, leptin genotype +/- | 42        | 4157                       | 6            | 0.14    |
| Cecum of mother 1 mouse offspring with genotype ob/ob                                           | 43        | Offspring: 3998            | Offspring: 5 | 0.13    |
| Cecum of mother 1 mouse offspring with genotype ob/ob                                           | 43        | Mother: 1120               | Mother: 2    | 0.18    |
| Human feces; subj10; 12 weeks; carb-r diet                                                      | 44        | 6909                       | 1            | 0.01    |
| Insect gut                                                                                      | 45        | 623                        | 3            | 0.48    |
| Push core sediment sample from the vadose zone of a hydrocarbon contaminated aquifer            | 46        | 486                        | 3            | 0.62    |
| Mud volcano                                                                                     | 47        | 185                        | 2            | 1.08    |









































|        |                                                                                                                         |   |   |   |   |   |   |   |   |   |   |
|--------|-------------------------------------------------------------------------------------------------------------------------|---|---|---|---|---|---|---|---|---|---|
| K19118 | csd2, cas7; CRISPR-associated protein Csd2                                                                              | 0 | 1 | 0 | 0 | 1 | 0 | 0 | 2 | 0 | 0 |
| K19119 | cas5d; CRISPR-associated protein Cas5d                                                                                  | 0 | 0 | 0 | 0 | 1 | 0 | 0 | 1 | 0 | 0 |
| K19134 | csx10; CRISPR-associated protein Csx10                                                                                  | 1 | 0 | 0 | 0 | 0 | 0 | 0 | 0 | 0 | 0 |
| K19137 | csn2; CRISPR-associated protein Csn2                                                                                    | 1 | 0 | 0 | 0 | 0 | 0 | 0 | 0 | 0 | 0 |
| K19138 | csm2; CRISPR-associated protein Csm2                                                                                    | 0 | 1 | 0 | 0 | 0 | 0 | 0 | 0 | 0 | 0 |
| K19139 | csm4; CRISPR-associated protein Csm4                                                                                    | 0 | 1 | 0 | 0 | 0 | 0 | 0 | 0 | 0 | 0 |
| K19140 | csm5; CRISPR-associated protein Csm5                                                                                    | 0 | 1 | 0 | 0 | 0 | 0 | 0 | 0 | 0 | 0 |
| K19141 | cmr5; CRISPR-associated protein Cmr5                                                                                    | 1 | 0 | 0 | 0 | 0 | 0 | 0 | 0 | 0 | 0 |
| K19147 | mcrC; 5-methylcytosine-specific restriction enzyme subunit McrC                                                         | 1 | 0 | 0 | 0 | 0 | 0 | 0 | 1 | 0 | 1 |
| K19157 | yafQ; mRNA interferase YafQ [EC:3.1.-.]                                                                                 | 2 | 0 | 1 | 0 | 0 | 0 | 0 | 0 | 0 | 0 |
| K19158 | yoeB; toxin YoeB [EC:3.1.-.]                                                                                            | 1 | 0 | 1 | 0 | 0 | 0 | 0 | 0 | 0 | 0 |
| K19159 | yefM; antitoxin YefM                                                                                                    | 1 | 0 | 0 | 0 | 0 | 0 | 0 | 0 | 0 | 0 |
| K19171 | dndD; DNA sulfox modification protein DndD                                                                              | 0 | 0 | 1 | 0 | 0 | 0 | 0 | 0 | 0 | 0 |
| K19200 | IAI; isopenicillin-N N-acyltransferase like protein                                                                     | 0 | 0 | 1 | 0 | 0 | 0 | 0 | 0 | 0 | 0 |
| K19221 | cobA, btuR; cob(II)alamin adenosyltransferase [EC:2.5.1.17]                                                             | 1 | 0 | 4 | 1 | 1 | 1 | 1 | 1 | 1 | 1 |
| K19222 | menI, DHNAT; 1,4-dihydroxy-2-naphthoyl-CoA hydrolase [EC:3.1.2.28]                                                      | 0 | 0 | 0 | 0 | 0 | 0 | 0 | 0 | 1 | 0 |
| K19224 | lye; cwfF; peptidoglycan O1-endopeptidase lytE [EC:3.4.-.]                                                              | 1 | 1 | 1 | 0 | 0 | 0 | 0 | 0 | 0 | 0 |
| K19239 | spz2; predicted membrane protein                                                                                        | 1 | 1 | 1 | 0 | 0 | 0 | 0 | 0 | 0 | 0 |
| K19244 | ala; alanine dehydrogenase [EC:1.4.1.1]                                                                                 | 0 | 0 | 1 | 0 | 0 | 0 | 0 | 0 | 0 | 0 |
| K19270 | hxpA; mannitol-1-/sugar-/sorbitol-6-phosphatase [EC:3.1.3.22 3.1.3.23 3.1.3.50]                                         | 1 | 0 | 0 | 0 | 0 | 0 | 0 | 1 | 0 | 0 |
| K19294 | algI; alginate O-acetyltransferase complex protein AlgI                                                                 | 1 | 0 | 1 | 0 | 1 | 0 | 0 | 1 | 1 | 1 |
| K19302 | bcrC; undecaprenyl-diphosphatase [EC:3.6.1.27]                                                                          | 2 | 1 | 3 | 1 | 1 | 1 | 1 | 0 | 1 | 1 |
| K19333 | kdgR; Icr family transcriptional regulator, KDG regulon repressor                                                       | 0 | 0 | 2 | 0 | 1 | 0 | 0 | 0 | 0 | 0 |
| K19350 | lsa; lincosamide and streptogramin A transport system ATP-binding/permease protein                                      | 0 | 0 | 1 | 0 | 1 | 0 | 0 | 0 | 0 | 1 |
| K19405 | mcsB; protein arginine kinase [EC:2.7.14.1]                                                                             | 1 | 1 | 1 | 1 | 1 | 1 | 1 | 1 | 0 | 0 |
| K19411 | mcsA; protein arginine kinase activator                                                                                 | 1 | 1 | 1 | 1 | 1 | 1 | 1 | 1 | 0 | 0 |
| K19421 | epsC; polysaccharide biosynthesis protein EpsC                                                                          | 1 | 1 | 1 | 1 | 1 | 1 | 0 | 1 | 0 | 0 |
| K19422 | epsD; glycosyltransferase EpsD [EC:2.4.-.]                                                                              | 1 | 0 | 2 | 0 | 1 | 1 | 0 | 0 | 0 | 0 |
| K19423 | epsE; glycosyltransferase EpsE [EC:2.4.-.]                                                                              | 1 | 0 | 0 | 0 | 1 | 1 | 0 | 0 | 0 | 0 |
| K19424 | epsF; glycosyltransferase EpsF [EC:2.4.-.]                                                                              | 0 | 0 | 0 | 0 | 0 | 1 | 0 | 0 | 0 | 0 |
| K19425 | epsH; glycosyltransferase EpsH [EC:2.4.-.]                                                                              | 1 | 0 | 0 | 0 | 0 | 0 | 0 | 0 | 0 | 0 |
| K19427 | epsI; glycosyltransferase EpsI [EC:2.4.-.]                                                                              | 1 | 0 | 0 | 0 | 1 | 0 | 0 | 0 | 0 | 0 |
| K19428 | epsJ; sugar transferase EpsJ [EC:2.-.-.]                                                                                | 0 | 0 | 1 | 0 | 1 | 0 | 0 | 0 | 0 | 0 |
| K19430 | epsN; pyridoxal phosphate-dependent aminotransferase EpsN [EC:2.6.1.-.]                                                 | 1 | 0 | 1 | 0 | 1 | 1 | 0 | 0 | 0 | 0 |
| K19545 | lnuA_C_D_E; lin; lincosamide nucleotidyltransferase A/C/D/E                                                             | 0 | 0 | 0 | 0 | 1 | 0 | 0 | 0 | 0 | 0 |
| K19689 | ampS, pepS, ampT; aminopeptidase [EC:3.4.11.-.]                                                                         | 1 | 1 | 1 | 1 | 1 | 1 | 1 | 1 | 1 | 1 |
| K19709 | ydfI; acetate CoA-transferase [EC:2.8.3.8]                                                                              | 0 | 0 | 1 | 0 | 0 | 0 | 0 | 0 | 0 | 0 |
| K19736 | aeR; TetR/Acr family transcriptional regulator, regulator of autoinduction and epiphytic fitness                        | 0 | 0 | 0 | 0 | 0 | 0 | 0 | 1 | 0 | 0 |
| K19784 | chrR; NOR; chromate reductase, NAD(P)H dehydrogenase (quinone)                                                          | 1 | 0 | 1 | 0 | 1 | 0 | 0 | 0 | 0 | 0 |
| K19802 | ycjG, ykfb; L-Ala-D/L-Glu epimerase [EC:5.1.1.20]                                                                       | 0 | 0 | 1 | 0 | 0 | 0 | 0 | 0 | 0 | 0 |
| K19814 | eam; glutamate 2,3-aminomutase [EC:5.4.3.9]                                                                             | 2 | 1 | 0 | 0 | 0 | 0 | 0 | 0 | 0 | 0 |
| K19955 | adh2; alcohol dehydrogenase [EC:1.1.1.-.]                                                                               | 1 | 0 | 0 | 0 | 0 | 1 | 1 | 1 | 0 | 0 |
| K19960 | chnA; cyclohexanol dehydrogenase [EC:1.1.1.245]                                                                         | 1 | 0 | 0 | 0 | 0 | 0 | 0 | 0 | 0 | 0 |
| K20038 | cutC; choline trimethylamine-lyase [EC:4.3.99.4]                                                                        | 1 | 1 | 1 | 0 | 0 | 0 | 0 | 0 | 0 | 0 |
| K20074 | prpC, phpP; PPM family protein phosphatase [EC:3.1.3.16]                                                                | 1 | 1 | 1 | 1 | 2 | 1 | 1 | 1 | 1 | 1 |
| K20156 | sgc5; 2-amino-4-deoxychorismate dehydrogenase [EC:1.3.8.16]                                                             | 0 | 0 | 0 | 0 | 0 | 0 | 0 | 0 | 0 | 0 |
| K20265 | gadC; glutamate:GABA antiporter                                                                                         | 0 | 0 | 0 | 2 | 2 | 0 | 0 | 0 | 0 | 0 |
| K20429 | vioA; dTDP-4-amino-4,6-dideoxy-D-glucose transaminase [EC:2.6.1.33]                                                     | 1 | 0 | 1 | 0 | 0 | 0 | 0 | 0 | 0 | 0 |
| K20445 | ndhF; nicotinate dehydrogenase FAD-subunit [EC:1.17.1.5]                                                                | 0 | 1 | 4 | 0 | 0 | 1 | 0 | 0 | 0 | 0 |
| K20446 | ndhS; nicotinate dehydrogenase small FeS subunit [EC:1.17.1.5]                                                          | 0 | 0 | 1 | 0 | 0 | 0 | 0 | 0 | 0 | 0 |
| K20447 | ndhL; nicotinate dehydrogenase large molybdopterin subunit [EC:1.17.1.5]                                                | 2 | 3 | 9 | 0 | 0 | 1 | 1 | 3 | 0 | 0 |
| K20448 | ndhM; nicotinate dehydrogenase medium molybdopterin subunit [EC:1.17.1.5]                                               | 0 | 0 | 1 | 0 | 0 | 0 | 0 | 1 | 0 | 0 |
| K20449 | hnr; 6-hydroxynicotinate reductase [EC:1.3.7.1]                                                                         | 0 | 0 | 1 | 0 | 0 | 0 | 0 | 0 | 0 | 0 |
| K20451 | rmj; methylitaconate Delta-isomerase [EC:5.3.3.6]                                                                       | 0 | 0 | 4 | 0 | 0 | 0 | 0 | 0 | 0 | 0 |
| K20454 | dmi; 2,3-dimethylmalate lyase [EC:4.1.3.32]                                                                             | 0 | 0 | 0 | 0 | 0 | 0 | 0 | 1 | 0 | 0 |
| K20459 | nukF, mcdF, sbdF; lantibiotic transport system ATP-binding protein                                                      | 0 | 0 | 0 | 0 | 0 | 0 | 0 | 0 | 1 | 0 |
| K20460 | nukE, mcdE, sbdE; lantibiotic transport system permease protein                                                         | 0 | 0 | 0 | 0 | 0 | 0 | 0 | 0 | 1 | 0 |
| K20487 | nisK, spaK; two-component system, OmpR family, lantibiotic biosynthesis sensor histidine kinase NisK/SpaK [EC:2.7.13.3] | 1 | 0 | 0 | 0 | 0 | 0 | 0 | 0 | 1 | 1 |
| K20488 | nisR, spaR; two-component system, OmpR family, lantibiotic biosynthesis response regulator NisR/SpaR                    | 1 | 0 | 0 | 0 | 1 | 0 | 0 | 0 | 1 | 1 |
| K20609 | sgcX; putative aminopeptidase [EC:3.4.11.-.]                                                                            | 0 | 0 | 1 | 0 | 0 | 0 | 0 | 0 | 0 | 0 |
| K20625 | ahy; acetylene hydratase [EC:4.2.1.112]                                                                                 | 0 | 0 | 3 | 0 | 0 | 0 | 0 | 0 | 0 | 0 |
| K20680 | fttB; dTDP-3-amino-3,6-dideoxy-alpha-D-galactopyranose transaminase [EC:2.6.1.90]                                       | 0 | 0 | 1 | 0 | 0 | 0 | 0 | 0 | 0 | 0 |
| K20763 | naa; 5-nitroanthranilic acid aminohydrolase [EC:3.5.99.8]                                                               | 0 | 0 | 1 | 0 | 0 | 0 | 0 | 0 | 0 | 0 |
| K20859 | phnPP; phosphoribosyl 1,2-cyclic phosphate 1,2-diphosphodiesterase [EC:3.1.4.57]                                        | 0 | 0 | 1 | 0 | 0 | 0 | 0 | 0 | 0 | 0 |
| K20882 | hadA; (R)-2-hydroxy-4-methylpentanoate CoA-transferase [EC:2.8.3.24]                                                    | 1 | 0 | 0 | 0 | 0 | 0 | 0 | 0 | 0 | 0 |
| K20922 | vpsJ; polysaccharide biosynthesis protein VpsJ                                                                          | 1 | 0 | 0 | 0 | 0 | 0 | 0 | 0 | 0 | 0 |
| K21020 | siaD; diguanylate cyclase [EC:2.7.7.65]                                                                                 | 0 | 0 | 1 | 0 | 0 | 0 | 0 | 0 | 0 | 0 |
| K21022 | roeA; diguanylate cyclase [EC:2.7.7.65]                                                                                 | 0 | 0 | 0 | 0 | 0 | 0 | 0 | 1 | 0 | 0 |
| K21028 | ynjE; molybdopterin synthase sulfurtransferase [EC:2.8.1.11]                                                            | 0 | 0 | 1 | 0 | 0 | 0 | 0 | 0 | 0 | 0 |
| K21029 | moeB; molybdopterin-synthase adenylyltransferase [EC:2.7.7.80]                                                          | 0 | 1 | 1 | 0 | 0 | 0 | 0 | 0 | 1 | 2 |
| K21030 | tari; D-ribitol-5-phosphate cytidyltransferase [EC:2.7.7.40]                                                            | 0 | 0 | 0 | 1 | 1 | 0 | 0 | 0 | 0 | 0 |

**Table S5.** Recipe for trace element solution A, 500 mL solution

| Description                                        | Volume (mg, unless stated) |
|----------------------------------------------------|----------------------------|
| HCl                                                | 10 mL                      |
| FeCl <sub>2</sub> ·4H <sub>2</sub> O               | 750                        |
| CoCl <sub>2</sub> ·6H <sub>2</sub> O               | 95                         |
| MnCl <sub>2</sub> ·4H <sub>2</sub> O               | 50                         |
| ZnCl <sub>2</sub>                                  | 35                         |
| H <sub>3</sub> BO <sub>3</sub>                     | 3                          |
| Na <sub>2</sub> MoO <sub>4</sub> ·H <sub>2</sub> O | 18                         |
| NiCl <sub>2</sub> ·6H <sub>2</sub> O               | 12                         |
| CuCl <sub>2</sub> ·2H <sub>2</sub> O               | 1                          |
| Water (MilliQ)                                     | 500 mL                     |

**Table S6.** Recipe for trace element solution B, 500 mL solution

| Description                                         | Volume (mg, unless stated) |
|-----------------------------------------------------|----------------------------|
| Na <sub>2</sub> SeO <sub>3</sub> ·5H <sub>2</sub> O | 3                          |
| NaWO <sub>4</sub> ·2H <sub>2</sub> O                | 4                          |
| NaOH                                                | 250                        |
| Water (MilliQ)                                      | 500 mL                     |

**Table S7.** Recipe for 1000X vitamin, 1L solution. After dissolving all the reagents in the water, the solution water was filter-sterilized three times into serum bottles and capped with sterile septa. The solution was then purged with sterile N<sub>2</sub> for 30 minutes.

| Description      | Volume (mg, unless stated) |
|------------------|----------------------------|
| p-aminobenzoate  | 20                         |
| Biotin           | 5                          |
| Nicotinic acid   | 50                         |
| Pantothenic acid | 25                         |
| Pyridoxine       | 75                         |
| Thiamine         | 50                         |
| Cyanocobalamin   | 50                         |
| Water (MilliQ)   | 1 L                        |

## FASP Protocol

All centrifugation steps were done at 14,000 rcf for 10 minutes unless indicated otherwise.

1. Each extract sample was diluted to a final concentration of 0.8  $\mu\text{g}/\mu\text{l}$  using ammonium bicarbonate buffer (ABC, 0.05 M stock, pH 9.0). The proteins in the diluted sample were denatured by adding dithioereitol to a final concentration of 5 mM and incubating the mixture at 30° C for 30 minutes.
2. The samples were mixed with 200  $\mu\text{l}$  of urea solution (UA, 8 M stock) and the filter units were centrifugated twice. The flow-through from each filter unit was discarded from the collection tube after each centrifugation step.
3. 100  $\mu\text{l}$  of iodoacetamide solution (IAA, 0.05 M) was added to the filter units and was mixed using a thermomixer temperature at 600 rpm. The filter unites were incubated for 20 minutes in the dark before being centrifugated.
4. 100  $\mu\text{l}$  of UA was added to the filter units which were then centrifugated twice.
5. 100  $\mu\text{l}$  of ABC was added to the filter units which were then centrifugated twice.
6. 40  $\mu\text{l}$  of ABC and 0.9  $\mu\text{l}$  of trypsin stock solution (0.4 ng/ $\mu\text{l}$ ) were added to the filter units and were mixed at 600 rpm in thermomixer for 1 minute. The flow-through from each filter unit was then discarded from the collection tube.
7. 500  $\mu\text{l}$  of MilliQ H<sub>2</sub>O was added to the filter units, which were incubated at 37° C in dark for 12 hours.
8. The filter component from each unit was relocated to a new container tube and was centrifugated.
9. 20  $\mu\text{l}$  of ABC was added to the filter units, which were then centrifugated twice. The flow-through containing peptides were transferred to 1.5 mL tubes and were stored at -20° C until proteomics analysis.

















WP\_089612429.1 hypothetical protein  
WP\_089612433.1 Protein LemA

|     |     |     |     |     |     |      |     |     |
|-----|-----|-----|-----|-----|-----|------|-----|-----|
| 3.9 | 1.2 | 0.3 | 3.3 | 0.9 | 0.3 | 27.2 | 7.3 | 0.3 |
| 7.0 | 1.4 | 0.2 | 5.0 | 0.8 | 0.2 | 26.0 | 7.6 | 0.3 |

Table S9. Protein assignments to 22 KEGG categories using BlastKOALA

| KEGG Functional Category                             | Category Code | Raw number | % out of total annotated (702) | % out of proteins in proteome (1,012) |
|------------------------------------------------------|---------------|------------|--------------------------------|---------------------------------------|
| Genetic information processing                       | 9120          | 115        | 16.4                           | 11.4                                  |
| Amino acid metabolism                                | 9105          | 97         | 13.8                           | 9.6                                   |
| Energy metabolism                                    | 9102          | 90         | 12.8                           | 8.9                                   |
| Metabolism of cofactors and vitamins                 | 9108          | 84         | 12.0                           | 8.3                                   |
| Carbohydrate metabolism                              | 9101          | 80         | 11.4                           | 7.9                                   |
| Protein families: genetic information processing     | 9182          | 58         | 8.3                            | 5.7                                   |
| Environmental information processing                 | 9130          | 49         | 7.0                            | 4.8                                   |
| Unclassified: metabolism                             | 9191          | 38         | 5.4                            | 3.8                                   |
| Nucleotide metabolism                                | 9104          | 36         | 5.1                            | 3.6                                   |
| Human diseases                                       | 9160          | 34         | 4.8                            | 3.4                                   |
| Protein families: signalling and cellular processing | 9183          | 33         | 4.7                            | 3.3                                   |
| Cellular processes                                   | 9140          | 33         | 4.7                            | 3.3                                   |
| Metabolism of other amino acids                      | 9106          | 23         | 3.3                            | 2.3                                   |
| Glycan biosynthesis and metabolism                   | 9107          | 22         | 3.1                            | 2.2                                   |
| Xenobiotics degradation and metabolism               | 9111          | 22         | 3.1                            | 2.2                                   |
| Organismal systems                                   | 9150          | 20         | 2.8                            | 2.0                                   |
| Unclassified                                         |               | 19         | 2.7                            | 1.9                                   |
| Protein families: metabolism                         | 9181          | 18         | 2.6                            | 1.8                                   |
| Unclassified: genetic information processing         | 9192          | 12         | 1.7                            | 1.2                                   |
| Unclassified: signalling and cellular processing     | 9193          | 11         | 1.6                            | 1.1                                   |
| Lipid metabolism                                     | 9103          | 10         | 1.4                            | 1.0                                   |
| Metabolism of terpenoids and polyketides             | 9109          | 4          | 0.6                            | 0.4                                   |











|                    |                |        |                                                      |      |                                                                                              |     |
|--------------------|----------------|--------|------------------------------------------------------|------|----------------------------------------------------------------------------------------------|-----|
| NZ_CP022121.1_211  | JBMCNGCN_00213 | K01926 | Protein families: genetic information and processing | 9182 | rex; redox-sensing transcriptional repressor                                                 | 138 |
| NZ_CP022121.1_1110 | JBMCNGCN_01151 | K02355 | Protein families: genetic information and processing | 9182 | fusa, GFM, EFG; elongation factor G                                                          | 558 |
| NZ_CP022121.1_2892 | JBMCNGCN_02968 | K02355 | Protein families: genetic information and processing | 9182 | fusa, GFM, EFG; elongation factor G                                                          | 426 |
| NZ_CP022121.1_2636 | JBMCNGCN_02701 | K02356 | Protein families: genetic information and processing | 9182 | efp; elongation factor P                                                                     | 138 |
| NZ_CP022121.1_1942 | JBMCNGCN_01999 | K02357 | Protein families: genetic information and processing | 9182 | tsf, TSM; elongation factor Ts                                                               | 200 |
| NZ_CP022121.1_682  | JBMCNGCN_00703 | K02469 | Protein families: genetic information and processing | 9182 | gyrA; DNA gyrase subunit A [EC:5.6.2.2]                                                      | 561 |
| NZ_CP022121.1_683  | JBMCNGCN_00704 | K02470 | Protein families: genetic information and processing | 9182 | gyrB; DNA gyrase subunit B [EC:5.6.2.2]                                                      | 465 |
| NZ_CP022121.1_1008 | JBMCNGCN_01036 | K02499 | Protein families: genetic information and processing | 9182 | yabN; tetrapyrrole methylase family protein / MazG family protein                            | 89  |
| NZ_CP022121.1_1137 | JBMCNGCN_01178 | K02518 | Protein families: genetic information and processing | 9182 | infA; translation initiation factor IF-1                                                     | 66  |
| NZ_CP022121.1_2561 | JBMCNGCN_02626 | K02519 | Protein families: genetic information and processing | 9182 | infB, MTIF2; translation initiation factor IF-2                                              | 384 |
| NZ_CP022121.1_2732 | JBMCNGCN_02799 | K02520 | Protein families: genetic information and processing | 9182 | infC, MTIF3; translation initiation factor IF-3                                              | 101 |
| NZ_CP022121.1_2558 | JBMCNGCN_02623 | K02600 | Protein families: genetic information and processing | 9182 | nusA; transcription termination/antitermination protein NusA                                 | 238 |
| NZ_CP022121.1_1100 | JBMCNGCN_01141 | K02601 | Protein families: genetic information and processing | 9182 | nusG; transcription termination/antitermination protein NusG                                 | 136 |
| NZ_CP022121.1_58   | JBMCNGCN_00059 | K02687 | Protein families: genetic information and processing | 9182 | prmA; ribosomal protein L11 methyltransferase [EC:2.1.1.]                                    | 144 |
| NZ_CP022121.1_2562 | JBMCNGCN_02627 | K02834 | Protein families: genetic information and processing | 9182 | rfa; ribosome-binding factor A                                                               | 57  |
| NZ_CP022121.1_896  | JBMCNGCN_00923 | K02835 | Protein families: genetic information and processing | 9182 | prfA, MTRF1, MRF1; peptide chain release factor 1                                            | 261 |
| NZ_CP022121.1_1944 | JBMCNGCN_02001 | K02838 | Protein families: genetic information and processing | 9182 | rrf, MRRF, RRF; ribosome recycling factor                                                    | 132 |
| NZ_CP022121.1_1933 | JBMCNGCN_01990 | K03168 | Protein families: genetic information and processing | 9182 | topA; DNA topoisomerase I [EC:5.6.2.1]                                                       | 424 |
| NZ_CP022121.1_1094 | JBMCNGCN_01130 | K03218 | Protein families: genetic information and processing | 9182 | rimB; 23S rRNA [guanosine2251'-O-] methyltransferase [EC:2.1.1.185]                          | 94  |
| NZ_CP022121.1_2729 | JBMCNGCN_02796 | K03437 | Protein families: genetic information and processing | 9182 | spou; RNA methyltransferase, TrmH family                                                     | 124 |
| NZ_CP022121.1_695  | JBMCNGCN_00716 | K03497 | Protein families: genetic information and processing | 9182 | parB, spo0I; ParB family transcriptional regulator, chromosome partitioning protein          | 123 |
| NZ_CP022121.1_1009 | JBMCNGCN_01037 | K03530 | Protein families: genetic information and processing | 9182 | hubB; DNA-binding protein HU-beta                                                            | 64  |
| NZ_CP022121.1_209  | JBMCNGCN_00211 | K03569 | Protein families: genetic information and processing | 9182 | mreB; rod shape-determining protein MreB and related proteins                                | 256 |
| NZ_CP022121.1_927  | JBMCNGCN_00954 | K03569 | Protein families: genetic information and processing | 9182 | mreB; rod shape-determining protein MreB and related proteins                                | 253 |
| NZ_CP022121.1_1203 | JBMCNGCN_01243 | K03595 | Protein families: genetic information and processing | 9182 | era, ERAL1; GTPase                                                                           | 176 |
| NZ_CP022121.1_204  | JBMCNGCN_00206 | K03609 | Protein families: genetic information and processing | 9182 | mind; septum site-determining protein Mind                                                   | 321 |
| NZ_CP022121.1_1065 | JBMCNGCN_01095 | K03624 | Protein families: genetic information and processing | 9182 | groA; transcription elongation factor GroA                                                   | 106 |
| NZ_CP022121.1_2469 | JBMCNGCN_02533 | K03631 | Protein families: genetic information and processing | 9182 | recN; DNA repair protein RecN (Recombination protein N)                                      | 144 |
| NZ_CP022121.1_1937 | JBMCNGCN_01994 | K03667 | Protein families: genetic information and processing | 9182 | hslU; ATP-dependent HslU protease ATP-binding subunit HslU                                   | 303 |
| NZ_CP022121.1_59   | JBMCNGCN_00060 | K03686 | Protein families: genetic information and processing | 9182 | dnaj; molecular chaperone DnaJ                                                               | 216 |
| NZ_CP022121.1_61   | JBMCNGCN_00062 | K03687 | Protein families: genetic information and processing | 9182 | grpE; molecular chaperone GrpE                                                               | 62  |
| NZ_CP022121.1_1081 | JBMCNGCN_01117 | K03696 | Protein families: genetic information and processing | 9182 | clpC; ATP-dependent Clp protease ATP-binding subunit ClpC                                    | 539 |
| NZ_CP022121.1_3893 | JBMCNGCN_03480 | K03698 | Protein families: genetic information and processing | 9182 | cbf, cbf1; 3'-5' exoribonuclease [EC:3.1.-.]                                                 | 166 |
| NZ_CP022121.1_2599 | JBMCNGCN_02664 | K03706 | Protein families: genetic information and processing | 9182 | codY; transcriptional pleiotropic repressor                                                  | 164 |
| NZ_CP022121.1_1024 | JBMCNGCN_01052 | K03788 | Protein families: genetic information and processing | 9182 | PP1B, pplb; peptidyl-prolyl cis-trans isomerase B (cyclophilin B) [EC:5.2.1.8]               | 151 |
| NZ_CP022121.1_702  | JBMCNGCN_00723 | K03833 | Protein families: genetic information and processing | 9182 | selB, EEFSec; selenocysteine-specific elongation factor                                      | 321 |
| NZ_CP022121.1_2546 | JBMCNGCN_02610 | K03977 | Protein families: genetic information and processing | 9182 | engA, der; GTPase                                                                            | 301 |
| NZ_CP022121.1_246  | JBMCNGCN_00254 | K04078 | Protein families: genetic information and processing | 9182 | groES, HSP61; chaperonin GroES                                                               | 68  |
| NZ_CP022121.1_1632 | JBMCNGCN_01685 | K04083 | Protein families: genetic information and processing | 9182 | hslO; molecular chaperone Hsp33                                                              | 208 |
| NZ_CP022121.1_1934 | JBMCNGCN_01991 | K04094 | Protein families: genetic information and processing | 9182 | mFO, gid; methylenetetrahydrofolate--RNA-(araci1-5)-methyltransferase [EC:2.1.1.7]           | 248 |
| NZ_CP022121.1_424  | JBMCNGCN_00434 | K05516 | Protein families: genetic information and processing | 9182 | cbpC; curved DNA-binding protein                                                             | 145 |
| NZ_CP022121.1_954  | JBMCNGCN_00981 | K05808 | Protein families: genetic information and processing | 9182 | yhbH; putative sigma-54 modulation protein                                                   | 112 |
| NZ_CP022121.1_468  | JBMCNGCN_00479 | K06284 | Protein families: genetic information and processing | 9182 | rB family transcriptional regulator, transcriptional pleiotropic regulator of transition st: | 64  |
| NZ_CP022121.1_755  | JBMCNGCN_00777 | K06942 | Protein families: genetic information and processing | 9182 | yehF; ribosome-binding ATPase                                                                | 230 |
| NZ_CP022121.1_2860 | JBMCNGCN_02994 | K07040 | Protein families: genetic information and processing | 9182 | ycdO, ylnB; DUF177 domain-containing protein                                                 | 66  |
| NZ_CP022121.1_1679 | JBMCNGCN_01443 | K07447 | Protein families: genetic information and processing | 9182 | ruvX; putative prokaryotic-16S rRNA nucleoside transferase                                   | 45  |
| NZ_CP022121.1_1006 | JBMCNGCN_01034 | K07533 | Protein families: genetic information and processing | 9182 | psrA; foldase protein PsrA [EC:5.2.1.8]                                                      | 24  |
| NZ_CP022121.1_192  | JBMCNGCN_00194 | K07574 | Protein families: genetic information and processing | 9182 | yhbY; RNA-binding protein                                                                    | 70  |
| NZ_CP022121.1_1084 | JBMCNGCN_01120 | K07736 | Protein families: genetic information and processing | 9182 | carD; CarD family transcriptional regulator                                                  | 140 |
| NZ_CP022121.1_197  | JBMCNGCN_00199 | K08301 | Protein families: genetic information and processing | 9182 | rng, cfaA; ribonuclease G [EC:3.1.26.-]                                                      | 329 |
| NZ_CP022121.1_999  | JBMCNGCN_01027 | K09685 | Protein families: genetic information and processing | 9182 | purI; purine operon repressor                                                                | 140 |
| NZ_CP022121.1_57   | JBMCNGCN_00058 | K09761 | Protein families: genetic information and processing | 9182 | rsmE; 16S rRNA (aracil498-N3)-methyltransferase [EC:2.1.1.193]                               | 115 |
| NZ_CP022121.1_1653 | JBMCNGCN_01706 | K09825 | Protein families: genetic information and processing | 9182 | perR; Fur family transcriptional regulator, peroxide stress response regulator               | 65  |
| NZ_CP022121.1_2395 | JBMCNGCN_02458 | K13628 | Protein families: genetic information and processing | 9182 | isca; iron-sulfur cluster assembly protein                                                   | 10  |
| NZ_CP022121.1_775  | JBMCNGCN_00797 | K18979 | Protein families: genetic information and processing | 9182 | queG; epoyoxyquinone reductase [EC:1.17.9.6]                                                 | 82  |
| NZ_CP022121.1_62   | JBMCNGCN_00063 | K22447 | Protein families: genetic information and processing | 9182 | ccr, tbc; archael chaperonin                                                                 | 391 |
| NZ_CP022121.1_1316 | JBMCNGCN_01367 | K02666 | Protein families: metabolism                         | 9181 | K06666; fatty-acyl-CoA synthase [EC:6.2.1.-]                                                 | 617 |
| NZ_CP022121.1_2766 | JBMCNGCN_02834 | K09093 | Protein families: metabolism                         | 9181 | eps8b, capB; protein-tyrosine kinase [EC:2.7.10.3]                                           | 87  |
| NZ_CP022121.1_1567 | JBMCNGCN_01620 | K01262 | Protein families: metabolism                         | 9181 | pepP; Xaa-Pro aminopeptidase [EC:3.4.11.9]                                                   | 158 |
| NZ_CP022121.1_1135 | JBMCNGCN_01176 | K01265 | Protein families: metabolism                         | 9181 | map; methionyl aminopeptidase [EC:3.4.11.18]                                                 | 216 |
| NZ_CP022121.1_1936 | JBMCNGCN_01993 | K01419 | Protein families: metabolism                         | 9181 | hslV, clpQ; ATP-dependent HslUV protease, peptidase subunit HslV [EC:3.4.25.2]               | 132 |
| NZ_CP022121.1_2639 | JBMCNGCN_02704 | K03568 | Protein families: metabolism                         | 9181 | tdlD; TldD protein                                                                           | 287 |
| NZ_CP022121.1_2638 | JBMCNGCN_02703 | K03592 | Protein families: metabolism                         | 9181 | pmbA; PmbA protein                                                                           | 239 |
| NZ_CP022121.1_971  | JBMCNGCN_00998 | K03797 | Protein families: metabolism                         | 9181 | E3.4.21.102, prc, ctpA; carboxyl-terminal processing protease [EC:3.4.21.102]                | 161 |
| NZ_CP022121.1_1298 | JBMCNGCN_01343 | K03797 | Protein families: metabolism                         | 9181 | E3.4.21.102, prc, ctpA; carboxyl-terminal processing protease [EC:3.4.21.102]                | 90  |
| NZ_CP022121.1_1438 | JBMCNGCN_01482 | K03798 | Protein families: metabolism                         | 9181 | ftsH, hlyB; cell division protease FtsH [EC:3.4.24.-]                                        | 413 |
| NZ_CP022121.1_1037 | JBMCNGCN_01067 | K03798 | Protein families: metabolism                         | 9181 | ftsH, hlyB; cell division protease FtsH [EC:3.4.24.-]                                        | 399 |
| NZ_CP022121.1_13   | JBMCNGCN_00014 | K06894 | Protein families: metabolism                         | 9181 | yfmM; alpha-2-macroglobulin                                                                  | 475 |
| NZ_CP022121.1_725  | JBMCNGCN_00747 | K08602 | Protein families: metabolism                         | 9181 | pepP, pepB; oligonucleotide phosphatase [EC:3.4.24.-]                                        | 376 |
| NZ_CP022121.1_1886 | JBMCNGCN_01943 | K12132 | Protein families: metabolism                         | 9181 | prkC, stkP; eukaryotic-like serine/threonine-protein kinase [EC:2.7.11.1]                    | 245 |
| NZ_CP022121.1_3891 | JBMCNGCN_03478 | K19224 | Protein families: metabolism                         | 9181 | lytE, cwfF; peptidoglycan DL-endopeptidase LytE [EC:3.4.-.]                                  | 19  |
| NZ_CP022121.1_734  | JBMCNGCN_00756 | K19689 | Protein families: metabolism                         | 9181 | ampS, pepS, ampT; aminopeptidase [EC:3.4.11.1]                                               | 294 |
| NZ_CP022121.1_1885 | JBMCNGCN_01942 | K20074 | Protein families: metabolism                         | 9181 | pprC, phpP; PPM family protein phosphatase [EC:3.1.3.16]                                     | 91  |
| NZ_CP022121.1_3579 | JBMCNGCN_03667 | K01552 | Protein families: signal and cellular processes      | 9182 | ecfA; energy-coupling factor transport system ATP-binding protein [EC:7.-.-.]                | 301 |
| NZ_CP022121.1_756  | JBMCNGCN_00778 | K01552 | Protein families: signal and cellular processes      | 9182 | ecfA; energy-coupling factor transport system ATP-binding protein [EC:7.-.-.]                | 168 |
| NZ_CP022121.1_2908 | JBMCNGCN_02982 | K16104 | Protein families: signal and cellular processes      | 9183 | mmdA; methylenecylo-CoxB biosynthesis subunit alpha [EC:7.2.4.3]                             | 501 |
| NZ_CP022121.1_2423 | JBMCNGCN_02486 | K01989 | Protein families: signal and cellular processes      | 9183 | K01989; putative tryptophan/lysine transport system substrate-binding protein                | 173 |
| NZ_CP022121.1_334  | JBMCNGCN_00342 | K02003 | Protein families: signal and cellular processes      | 9183 | ABC.CD.A; putative ABC transport system ATP-binding protein                                  | 104 |
| NZ_CP022121.1_2100 | JBMCNGCN_02164 | K02016 | Protein families: signal and cellular processes      | 9183 | ABC.FE.V.S; iron complex transport system substrate-binding protein                          | 124 |
| NZ_CP022121.1_1532 | JBMCNGCN_01585 | K02016 | Protein families: signal and cellular processes      | 9183 | ABC.FE.V.S; iron complex transport system substrate-binding protein                          | 74  |
| NZ_CP022121.1_1273 | JBMCNGCN_01316 | K02028 | Protein families: signal and cellular processes      | 9183 | ABC.PA.A; polar amino acid transport system ATP-binding protein [EC:7.4.2.1]                 | 131 |
| NZ_CP022121.1_1209 | JBMCNGCN_01249 | K02051 | Protein families: signal and cellular processes      | 9183 | ABC.SN.S; NiT/Tau family transport system substrate-binding protein                          | 141 |
| NZ_CP022121.1_2770 | JBMCNGCN_02838 | K02238 | Protein families: signal and cellular processes      | 9183 | comEC; competence protein ComEC                                                              | 78  |
| NZ_CP022121.1_55   | JBMCNGCN_00056 | K02503 | Protein families: signal and cellular processes      | 9183 | HINT1, hint1; histidine triad (HTI) family protein                                           | 61  |
| NZ_CP022121.1_888  | JBMCNGCN_00398 | K03282 | Protein families: signal and cellular processes      | 9183 | mscL; large conductance mechanosensitive channel                                             | 91  |
| NZ_CP022121.1_1792 | JBMCNGCN_01846 | K03284 | Protein families: signal and cellular processes      | 9183 | yhbE; phosphatase subunit alpha                                                              | 225 |
| NZ_CP022121.1_102  | JBMCNGCN_00103 | K03427 | Protein families: signal and cellular processes      | 9183 | hsdM; type II restriction enzyme M protein [EC:2.1.1.72]                                     | 408 |
| NZ_CP022121.1_2357 | JBMCNGCN_02426 | K03522 | Protein families: signal and cellular processes      | 9183 | fixB, eHfA; electron transfer flavoprotein alpha subunit                                     | 207 |
| NZ_CP022121.1_77   | JBMCNGCN_00078 | K03699 | Protein families: signal and cellular processes      | 9183 | tylC; magnesium and cobalt exporter, CNM family                                              | 225 |
| NZ_CP022121.1_1154 | JBMCNGCN_01195 | K06990 | Protein families: signal and cellular processes      | 9183 | MEMO1; MEMO1 family protein                                                                  | 224 |
| NZ_CP022121.1_562  | JBMCNGCN_00576 | K07316 | Protein families: signal and cellular processes      | 9183 | mod; adenine-specific DNA-methyltransferase [EC:2.1.1.72]                                    | 211 |
| NZ_CP022121.1_3348 | JBMCNGCN_03431 | K07316 | Protein families: signal and cellular processes      | 9183 | mod; adenine-specific DNA-methyltransferase [EC:2.1.1.72]                                    | 208 |
| NZ_CP022121.1_1218 | JBMCNGCN_01258 | K07473 | Protein families: signal and cellular processes      | 9183 | dinJ; DNA-damage-inducible protein J                                                         | 42  |
| NZ_CP022121.1_2960 | JBMCNGCN_03040 | K08369 | Protein families: signal and cellular processes      | 9183 | ydjE; MFS transporter, putative metabolite:H+ symporter                                      | 269 |
| NZ_CP022121.1_493  | JBMCNGCN_00505 | K08369 | Protein families: signal and cellular processes      | 9183 | ydjE; MFS transporter, putative metabolite:H+ symporter                                      | 178 |
| NZ_CP022121.1_870  | JBMCNGCN_00897 | K09013 | Protein families: signal and cellular processes      | 9183 | suFC; Fe-S cluster assembly ATP-binding protein                                              | 163 |
| NZ_CP022121.1_80   | JBMCNGCN_00081 | K14392 | Protein families: signal and cellular processes      | 9182 | panF; sodium/garothenate symporter                                                           | 101 |
| NZ_CP022121.1_406  | JBMCNGCN_00416 | K15987 | Protein families: signal and cellular processes      | 9183 | hpaA; K(+)-stimulated pyrophosphate-energized sodium pump [EC:7.1.3.2]                       | 792 |
| NZ_CP022121.1_354  | JBMCNGCN_00362 | K15987 | Protein families: signal and cellular processes      | 9183 | hpaA; K(+)-stimulated pyrophosphate-energized sodium pump [EC:7.1.3.2]                       | 418 |
| NZ_CP022121.1_2368 | JBMCNGCN_02437 | K19091 | Protein families: signal and cellular processes      | 9183 | casG; CRISPR-associated endoribonuclease CasG [EC:3.1.-.]                                    | 29  |
| NZ_CP022121.1_3443 | JBMCNGCN_03529 | K19115 | Protein families: signal and cellular processes      | 2913 | chz2; CRISPR-associated protein Chz2                                                         | 237 |
| NZ_CP022121.1_2983 | JBMCNGCN_03064 | K19156 | Protein families: signal and cellular processes      | 9186 | prf, sohA; antitoxin Prf                                                                     | 12  |
| NZ_CP022121.1_2767 | JBMCNGCN_02835 | K19420 | Protein families: signal and cellular processes      | 9183 | epsA, capA; protein tyrosine kinase modulator                                                | 48  |
| NZ_CP022121.1_1247 | JBMCNGCN_01288 | K25034 | Protein families: signal and cellular processes      | 9183 | btuB; cobalamin transport system substrate-binding protein                                   | 114 |
| NZ_CP022121.1_721  | JBMCNGCN_00743 | K00179 | Unclassified                                         |      | iorA; indolepyruvate ferredoxin oxidoreductase, alpha subunit [EC:1.2.7.8]                   | 409 |
| NZ_CP022121.1_722  | JBMCNGCN_00744 | K00180 | Unclassified                                         |      | iorB; indolepyruvate ferredoxin oxidoreductase, beta subunit [EC:1.2.7.8]                    | 119 |
| NZ_CP022121.1_2358 | JBMCNGCN_02427 | K00313 | Unclassified                                         |      | fixC; electron transfer flavoprotein-quinone oxidoreductase [EC:1.5.5.-]                     | 248 |
| NZ_CP022121.1_2935 | JBMCNGCN_03015 | K00573 | Unclassified                                         |      | E2.1.1.77, pcm; protein-L-isoaspartate(D-aspartate)-O-methyltransferase [EC:2.1.1.77]        | 81  |
| NZ_CP022121.1_1486 | JBMCNGCN_01540 | K01023 | Unclassified                                         |      | astT; arylsulfate sulfotransferase [EC:2.8.2.22]                                             | 287 |
| NZ_CP022121.1_1879 | JBMCNGCN_01936 | K01462 | Unclassified                                         |      | PDF, def; peptide deformylase [EC:3.5.1.88]                                                  | 46  |
| NZ_CP022121.1_2842 | JBMCNGCN_02915 | K01463 | Unclassified                                         |      | bshB1; N-acetylglucosamine malate decarboxylase I [EC:3.5.5.-]                               | 288 |
| NZ_CP022121.1_3213 | JBMCNGCN_03293 | K01533 | Unclassified                                         |      | copB; P-type Cu2+ transporter [EC:7.2.2.9]                                                   | 38  |
| NZ_CP022121.1_1389 | JBMCNGCN_01440 | K01537 | Unclassified                                         |      | ATP2C; P-type Ca2+ transporter type 2C [EC:7.2.2.10]                                         | 653 |
| NZ_CP022121.1_978  | JBMCNGCN_01005 | K01993 | Unclassified                                         |      | ABC-2.TX; HlyD family secretion protein                                                      | 101 |
| NZ_CP022121.1_1462 | JBMCNGCN_01516 | K03744 | Unclassified                                         |      | lemA; LemA protein                                                                           | 103 |
| NZ_CP022121.1_3619 | JBMCNGCN_03707 | K03744 | Unclassified                                         |      | lemA; LemA protein                                                                           | 62  |
| NZ_CP022121.1_3412 | JBMCNGCN_03499 | K03753 | Unclassified                                         |      | mobB; molybdopterine-guanine dinucleotide biosynthesis adapter protein                       | 81  |
| NZ_CP022121.1_90   | JBMCNGCN_00091 | K03969 | Unclassified                                         |      | pspA; phage shock protein A                                                                  | 139 |
| NZ_CP022121.1_3246 | JBMCNGCN_03327 | K04750 | Unclassified                                         |      | phnB; PhnB protein                                                                           | 103 |
| NZ_CP022121.1_2254 | JBMCNGCN_02323 | K05937 | Unclassified                                         |      | K05937; uncharacterized protein                                                              | 52  |
| NZ_CP022121.1_715  | JBMCNGCN_00737 | K06207 | Unclassified                                         |      | tpa, bpa; GTP-binding protein                                                                | 418 |
| NZ_CP022121.1_1629 | JBMCNGCN_01682 | K06923 | Unclassified                                         |      | K06923; uncharacterized protein                                                              | 162 |
| NZ_CP022121.1_601  | JBMCNGCN_00615 | K06926 | Unclassified                                         |      | K06926; uncharacterized protein                                                              | 43  |
| NZ_CP022121.1_818  | JBMCNGCN_00844 | K06929 | Unclassified                                         |      | K06929; uncharacterized protein                                                              | 47  |
| NZ_CP022121.1_1047 | JBMCNGCN_01077 | K06950 |                                                      |      |                                                                                              |     |



Table S11. Similarity of electron bifurcation proteins identified from *D. formicoaceticum* proteome against proteins described in previous studies

| S. ovata |                | Sporomusa ovata |         | S. fructosivorans JJ                                                    |                | Solidisulfobivibrio fructosivorans JJ                                                        |          | O. alaskensis G20 |           | Oleidesulfobivibrio alaskensis G20 |  |
|----------|----------------|-----------------|---------|-------------------------------------------------------------------------|----------------|----------------------------------------------------------------------------------------------|----------|-------------------|-----------|------------------------------------|--|
| Query    | Prokka ID      | Query           | NCBI ID | Query Description                                                       | Subject        | Subject Description                                                                          | Coverage | Identity          | E-value   | Score                              |  |
| StnA     | JBMCGNCK_01549 | WP_089609810.1  |         | NADH-quinone oxidoreductase subunit E                                   | WP_021167189.1 | StnA ( <i>S. ovata</i> )                                                                     | 84.0%    | 41.3%             | 3.00E-39  | 119                                |  |
| StnB     | JBMCGNCK_01550 | WP_242965405.1  |         | NAD(P)H-quinone oxidoreductase subunit E                                | WP_021167190.1 | StnB ( <i>S. ovata</i> )                                                                     | 94.0%    | 57.3%             | 0         | 583                                |  |
| StnC     | JBMCGNCK_01551 | WP_089609812.1  |         | FAD-dependent oxidoreductase                                            | WP_021167191.1 | StnC ( <i>S. ovata</i> )                                                                     | 88.0%    | 40.7%             | 0         | 833                                |  |
| HndA     | JBMCGNCK_01556 | WP_089609814.1  |         | NuoE-like protein                                                       | EFL52768.1     | NADH dehydrogenase (ubiquinone) 24 dKa subunit ( <i>S. fructosivorans JJ</i> )               | 91%      | 40.4%             | 1.00E-45  | 134                                |  |
| HndB     | JBMCGNCK_01557 | WP_157677371.1  |         | (2Fe-2S) ferredoxin domain-containing protein                           | EFL52769.1     | Putative NAD-reducing hydrogenase subunit ( <i>S. fructosivorans JJ</i> )                    | 90.0%    | 36.1%             | 4.00E-23  | 73.9                               |  |
| HndC     | JBMCGNCK_01558 | WP_242965405.1  |         | NADH-quinone oxidoreductase subunit NuoF                                | EFL52770.1     | NADH dehydrogenase (quinone) [ <i>S. fructosivorans JJ</i> ]                                 | 75.0%    | 62.0%             | 0         | 567                                |  |
| HndD     | JBMCGNCK_01559 | WP_089609815.1  |         | [FeFe] hydrogenase, group A                                             | EFL52771.1     | Hydrogenase, Fe-only ( <i>S. fructosivorans JJ</i> )                                         | 100.0%   | 54.3%             | 0         | 610                                |  |
| FloxA    | JBMCGNCK_01698 | WP_157677380.1  |         | Hydrogenase iron-sulfur subunit                                         | ABB38011.2     | methyl-viologen-reducing hydrogenase delta subunit ( <i>O. alaskensis G20</i> )              | 100.0%   | 52.2%             | 1.00E-26  | 85.5                               |  |
| FloxB    | JBMCGNCK_01699 | WP_089609931.1  |         | 4Fe-4S binding protein                                                  | ABB38012.1     | 4Fe-4S ferredoxin iron-sulfur binding domain-containing protein ( <i>O. alaskensis G20</i> ) | 91%      | 32.67%            | 1.00E-55  | 172                                |  |
| FloxC    | JBMCGNCK_01700 | WP_198306669.1  |         | 4Fe-4S dicluster domain-containing protein                              | ABB38013.1     | Putative hydrogenase ( <i>O. alaskensis G20</i> )                                            | 96%      | 33.73%            | 1.00E-65  | 201                                |  |
| FloxD    | JBMCGNCK_01701 | WP_089609932.1  |         | FAD/NAD(P)-binding protein                                              | ABB38014.1     | Dihydroorotate dehydrogenase, electron transfer subunit ( <i>O. alaskensis G20</i> )         | 97%      | 47.5              | 1.00E-99  | 283                                |  |
| HdrA     | JBMCGNCK_01696 | WP_089609930.1  |         | CoB--CoM heterodisulfide reductase iron-sulfur subunit A family protein | ABB38010.1     | 4Fe-4S ferredoxin iron-sulfur binding domain-containing protein ( <i>O. alaskensis G20</i> ) | 99%      | 53.80%            | 2.00E-176 | 499                                |  |
| HdrA     | JBMCGNCK_01697 | WP_089609930.1  |         | CoB--CoM heterodisulfide reductase iron-sulfur subunit A family protein | ABB38010.1     | 4Fe-4S ferredoxin iron-sulfur binding domain-containing protein ( <i>O. alaskensis G20</i> ) | 98%      | 60.20%            | 7.00E-80  | 240                                |  |
| HdrB     | JBMCGNCK_01695 | WP_089609929.1  |         | CoB--CoM heterodisulfide reductase iron-sulfur subunit B family protein | ABB38009.1     | CoB--CoM heterodisulfide reductase subunit B ( <i>O. alaskensis G20</i> )                    | 92%      | 42.91%            | 1.00E-86  | 251                                |  |
| HdrC     | JBMCGNCK_01694 | WP_198306668.1  |         | 4Fe-4S dicluster domain-containing protein                              | ABB38018.1     | Heterodisulfide reductase C subunit ( <i>O. alaskensis G20</i> )                             | 91%      | 37.90%            | 2.00E-49  | 149                                |  |

**Figure S1.** Distribution of genes encoding TCA cycle in the *Dehalobacteriia*

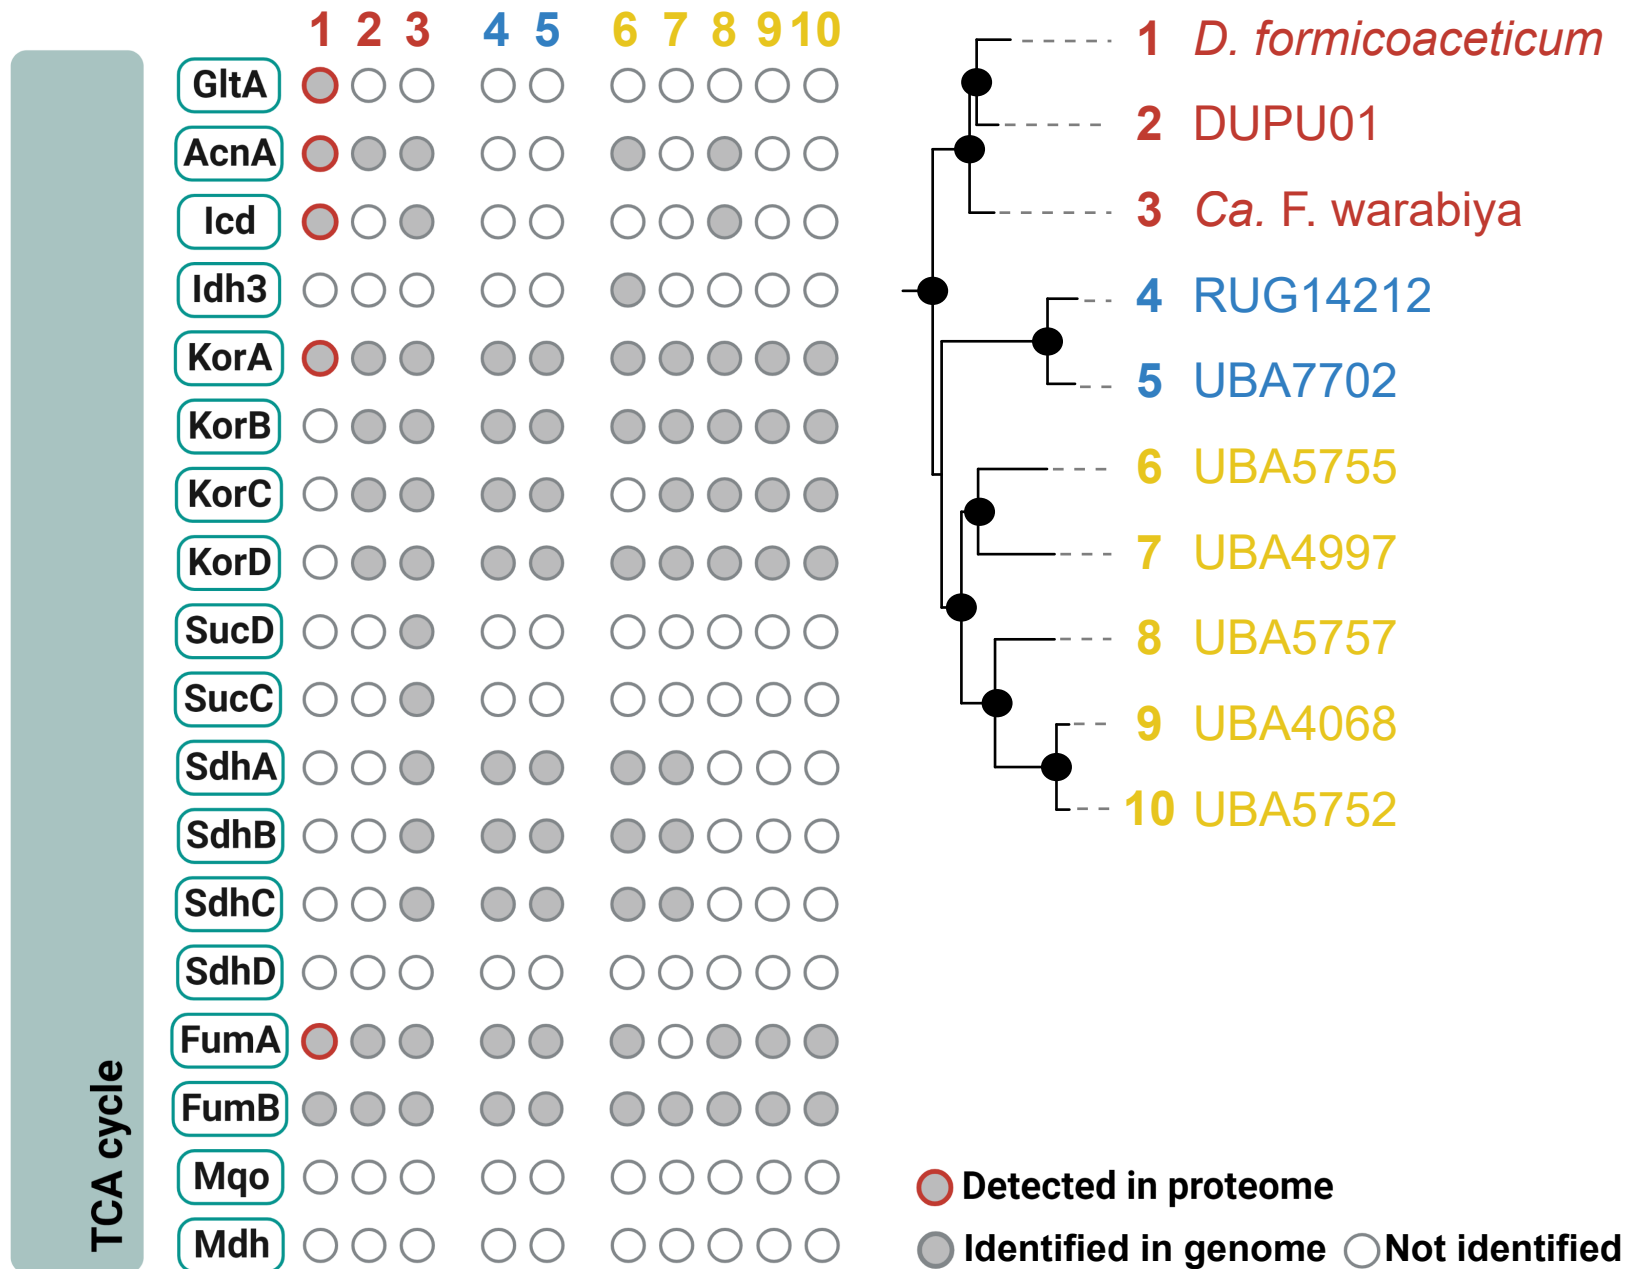

Supplement: mgen-9-1039-s001.pdf [file mgen-9-1039-s001.pdf]
